# Supplementary material for: BZR1 Physically Interacts with SPL9 to Regulate the Vegetative Phase Change and Cell Elongation in Arabidopsis
Source: MDPI journal article supplement (doi:10.3390/ijms221910415), 2021-09-27
Supplement: s1 [file s1]

Table S1. Oligonucleotide sequences used in this paper.

Gene cloning

| Gene | Forward               | Reverse                |
|------|-----------------------|------------------------|
| SPL9 | ATGGAGATGGGTCCAACCTCG | GAGAGACCAGTTGGTATGG    |
| BIN2 | ATGGCTGATGATAAGGAGATG | AGTCCAGATTGATTCAAGAAGC |
| BZR1 | ATGACTTCGGAGCTACG     | ACCACGAGCCTTCCCATTTC   |

Mutant Genotyping

| Gene                        | Forward                               | Reverse                    |
|-----------------------------|---------------------------------------|----------------------------|
| DET2<br>( <i>det2-1</i> )   | AGGAGGCTGGTTCGAGTTGGTA                | AAGGAATAACAGCTTTACGAGT     |
| BRI1<br>( <i>bri1-301</i> ) | ATGAAGACTTTTTCAAGCTTCTT<br>TC         | TTTTCCTTCAGGAAGTTCTTTTATAC |
| BIN2<br>( <i>bin2-1</i> )   | CACAATGTTGCTGGAGTTGCTC<br>ACAGAGATCTA | AGTCCAGATTGATTCAAGAAGC     |

qPT-PCR

| Gene    | Forward                                          | Reverse                   |
|---------|--------------------------------------------------|---------------------------|
| PP2ART  | TTCTCGCTCCAGTAATGGGATC<br>CGA                    | GTTCTCCACAACCGCTTGGTCGACT |
| SPL9RT  | TGTGGCTGGTATCGAACAGAG<br>G                       | TTCCGGAAGCTGATGAAACCTG    |
| SPL10RT | GCGTTTCAAACATCTGGTGGGT<br>TC                     | CCTGAGCATTCTCCCACACCTTTG  |
| SPL15RT | TCGCTCCATCTCTTTACGGAAA<br>CC                     | TGCATCACTGATCTTGCGGTTG    |
| PRE1RT  | GTTCTGATAAGGCATCAGCCTC<br>G                      | CATGAGTAGGCTTCTAATAACGG   |
| PRE2RT  | ACTCTGTGTGGTGGCACAAC<br>G                        | ACGTTGACTCCAAGGACCACTC    |
| PRE5RT  | AACGGCGTCGTTCTGATAAG<br>ACCGTTTGTGCGGAACCTCTTGGC | CATGAGTAAGCTTCTAATCACGG   |
| PRE6RT  |                                                  | AGCTCCTAATGATGGCTGCTTCG   |
